# Supplementary material
Source: PubMed Central journal article supplement (PMC3799195)
Supplement: tlo0605_0528SD1.pdf [file tlo0605_0528SD1.pdf]

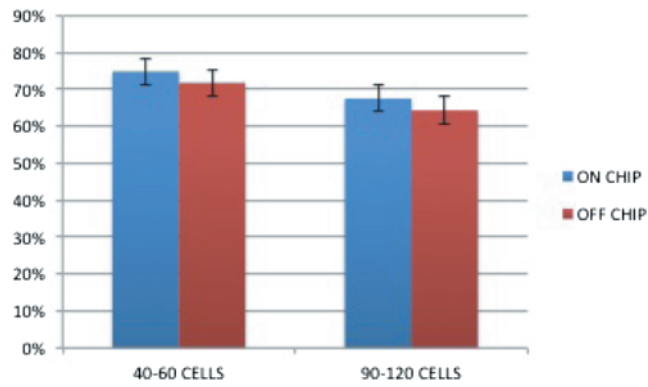

**Figure W1.** Recovery of CTCs from device to collection vessel. Target cell loss during the critical recovery step was characterized to be between 3% and 4% of the total CTC number.
